# Supplementary material for: Assessing the Goodness of Fit of Phylogenetic Comparative Methods: A Meta-Analysis and Simulation Study
Source: PubMed Central journal article supplement (PMC3694968; doi:10.1371/journal.pone.0067001), 2013-06-27
Supplement: pone.0067001.s001.pdf [file pone.0067001.s001.pdf]

# Appendix S1

**Theorem 1:** Let  $X_t$  and  $Y_t$ ,  $t > 0$  be two OU process random variables. Given a rooted phylogeny for trait evolution, assuming that the constraining force parameters  $\alpha_x$  and  $\alpha_y$  are constants during the evolutionary process, the covariance between the trait  $X$  of species  $i$  and the trait  $Y$  of species  $j$  is

$$\text{cov}[X_i, Y_j] = \rho \sigma_x \sigma_y e^{-\alpha_x t_i} e^{-\alpha_y t_j} \frac{1 - e^{-(\alpha_x + \alpha_y) t_{ij}}}{\alpha_x + \alpha_y}, i, j = 1, 2, \dots, n.$$

where  $t_{ij}$  measures the branch length from the root to the most common ancestor of species  $i$  and  $j$ ;  $t_i, t_j$  are the branch lengths for species  $i$  and  $j$  since they diverged.

**Proof:**

As the covariation between two traits does not depend on their means, it suffices to consider the system of non mean-reverting SDEs.

$$dX_t = -\alpha_x X_t dt + \sigma_x dB_{x,t}$$

$$dY_t = -\alpha_y Y_t dt + \sigma_y dB_{y,t}$$

Discretize the SDEs, we have

$$X_{t+\Delta t} = (1 - \alpha_x \Delta t) X_t + \sigma_x (B_{x,t+\Delta t} - B_{x,t})$$

$$Y_{t+\Delta t} = (1 - \alpha_y \Delta t) Y_t + \sigma_y (B_{y,t+\Delta t} - B_{y,t})$$

where  $\Delta t = \frac{t}{n}$  is the infinitesimal unit of time.

Given a rooted phylogeny, we can decompose the trait values at tip  $i$  and  $j$ ,  $X_i, Y_j$  as

following

$$X_i = X_{\text{mrca}(i,j)} + \Delta X_i \text{ and } Y_j = Y_{\text{mrca}(i,j)} + \Delta Y_j$$

where the  $\text{mrca}(i, j)$  represents the most common ancestor for species  $i$  and  $j$ ,  $X_{\text{mrca}(i,j)}$  and  $Y_{\text{mrca}(i,j)}$  are the traits for  $\text{mrca}(i, j)$ , and  $\Delta X_i$  and  $\Delta Y_j$  are the changes in trait value from their most common ancestor to the extant species  $X_i$  and  $Y_j$ . Then the covariance between  $X_i$  and  $Y_j$  can be written as

$$\begin{aligned} \text{cov}[X_i, Y_j] &= E[(X_{\text{mrca}(i,j)} + \Delta X_i)(Y_{\text{mrca}(i,j)} + \Delta Y_j)] \\ &= E[X_{\text{mrca}(i,j)}Y_{\text{mrca}(i,j)}] + E[X_{\text{mrca}(i,j)}\Delta Y_j] + E[Y_{\text{mrca}(i,j)}\Delta X_i] + E[\Delta X_i\Delta Y_j] \end{aligned} \quad (\text{a})$$

Note that this method was also used in Blomberg et al. [1] where a discrete version of the OU process was applied. Let  $t_j = m\Delta t$  be the branch length from the most common ancestor of  $i$  and  $j$  to the species  $j$  at the tips. Then  $Y_j$  can be represented as

$$\begin{aligned} Y_j &= (1 - \alpha_y \Delta t)^{m+1} Y_{\text{mrca}(i,j)} \\ &+ \sigma_y \sum_{k=0}^m (1 - \alpha_y \Delta t)^{m-k} \{B_{y,(n-m+k+1)\Delta t} - B_{y,(n-m+k)\Delta t}\} \end{aligned}$$

The expectation,  $E[X_{\text{mrca}(i,j)}\Delta Y_j]$ , is

$$\begin{aligned} &E[X_{\text{mrca}(i,j)}\Delta Y_j] \\ &= E[X_{\text{mrca}(i,j)}\{-Y_{\text{mrca}(i,j)} + Y_j\}] \end{aligned}$$

$$\begin{aligned}
&= -E[X_{mrca(i,j)}Y_{mrca(i,j)}] \\
&\quad + E\left[X_{mrca(i,j)}\left\{(1 - \alpha_y\Delta t)^{m+1}Y_{mrca(i,j)}\right.\right. \\
&\quad \left.\left.+ \sigma_y \sum_{k=0}^m (1 - \alpha_y\Delta t)^{m-k} [B_{y,(n-m+k+1)\Delta t} - B_{y,(n-m+k)\Delta t}]\right\}\right] \\
&= ((1 - \alpha_y\Delta t)^{m+1} - 1)E[X_{mrca(i,j)}Y_{mrca(i,j)}] \\
&= \left(1 - \alpha_y \frac{t_j}{m} \Delta t\right)^{m+1} - 1 \Big) E[X_{mrca(i,j)}Y_{mrca(i,j)}]
\end{aligned}$$

$$\text{So } E[X_{mrca(i,j)}\Delta Y_j] = \left(1 - \alpha_y \frac{t_j}{m} \Delta t\right)^{m+1} - 1 \Big) E[X_{mrca(i,j)}Y_{mrca(i,j)}] \quad (\text{b1})$$

Similarly, we have

$$E[Y_{mrca(i,j)}\Delta X_i] = \left(1 - \alpha_x \frac{t_i}{m} \Delta t\right)^{m+1} - 1 \Big) E[X_{mrca(i,j)}Y_{mrca(i,j)}] \quad (\text{b2})$$

Since trait evolution on different branches is independent, we have for  $k = 0, 1, \dots, m$ ,

$$E\left[[B_{x,(n-m+k+1)\Delta t} - B_{x,(n-m+k)\Delta t}][B_{y,(n-m+k+1)\Delta t} - B_{y,(n-m+k)\Delta t}]\right] = 0.$$

Hence,

$$E[\Delta X_i \Delta Y_j] = \left(1 - \alpha_x \frac{t_i}{m} \Delta t\right)^{m+1} - 1 \Big) \left(1 - \alpha_y \frac{t_j}{m} \Delta t\right)^{m+1} - 1 \Big) E[X_{mrca(i,j)}Y_{mrca(i,j)}]. \quad (\text{b3})$$

Substituting (b1), (b2), (b3) into (a) and simplifying, we have

$$\text{cov}[X_i, Y_j] = (1 - \alpha_x \frac{t_i}{m} \Delta t)^{m+1} (1 - \alpha_y \frac{t_j}{m} \Delta t)^{m+1} E[X_{mrca(i,j)}Y_{mrca(i,j)}]. \quad (\text{c})$$

To derive  $E[X_{mrca(i,j)}Y_{mrca(i,j)}]$ , as both species  $i$  and  $j$  are the same species from the root to their most common ancestor,  $X_i$  and  $Y_j$  can be regarded as two different traits of the same species. Since by Brownian motion the evolution after speciation is independent, the correlation  $\rho$  between the two Brownian motion processes is

non-zero only when the two traits were evolved in the same species. The correlation can thus be defined

$$E \left[ [B_{x,(j+1)\Delta t} - B_{x,j\Delta t}] [B_{y,(k+1)\Delta t} - B_{y,k\Delta t}] \right] = \begin{cases} \rho\Delta t, & j = k; \\ 0, & j \neq k. \end{cases}$$

Let  $t_{ij}$  be the branch length from the root to the most common ancestor of species  $i$  and  $j$ .  $t_{ij}$  can be divided into short intervals:  $t_{ij} = l\Delta t$ . Now using

$$Y_{mrca(i,j)} = (1 - \alpha_y\Delta t)^{l+1}Y_0 + \sigma_y \sum_{k=0}^l (1 - \alpha_y\Delta t)^{l-k} \{B_{y,(k+1)\Delta t} - B_{y,k\Delta t}\},$$

we have

$$E[X_{mrca(i,j)}Y_{mrca(i,j)}] = \left( (1 - \alpha_x \frac{t_{ij}}{l})^{l+1} \right) \left( (1 - \alpha_y \frac{t_{ij}}{l})^{l+1} \right) E[X_0Y_0] + \rho\sigma_x\sigma_y \frac{1 - (1 - \alpha_x \frac{t_{ij}}{l})^{l+1} (1 - \alpha_y \frac{t_{ij}}{l})^{l+1}}{\alpha_x + \alpha_y - \alpha_x\alpha_y \frac{t_{ij}}{l}}$$

Following [1] and assuming  $E[X_0Y_0] = 0$  (no correlation at the root), equation (c)

$$\text{becomes } cov[X_i, Y_j] = \rho\sigma_x\sigma_y (1 - \alpha_x \frac{t_i}{m})^{m+1} (1 - \alpha_y \frac{t_j}{m})^{m+1} \frac{1 - (1 - \alpha_x \frac{t_{ij}}{l})^{l+1} (1 - \alpha_y \frac{t_{ij}}{l})^{l+1}}{\alpha_x + \alpha_y - \alpha_x\alpha_y \frac{t_{ij}}{l}}$$

which converges to  $\rho\sigma_x\sigma_y e^{-\alpha_x t_i} e^{-\alpha_y t_j} \frac{1 - e^{-(\alpha_x + \alpha_y)t_{ij}}}{\alpha_x + \alpha_y}$  as  $m, l$  approach infinity

( $\Delta t$  approaches to 0).

In this study, I use  $t_{ij} = g_{ij}$ ,  $t_i = t_j = 1 - g_{ij}$  and  $t_i + t_{ij} = g_{ii} = 1$ . Therefore

the covariance structure used for data analysis is

$$cov[X_i, Y_j] = \rho\sigma_x\sigma_y e^{-(\alpha_x + \alpha_y)(1 - g_{ij})} \frac{1 - e^{-(\alpha_x + \alpha_y)g_{ij}}}{\alpha_x + \alpha_y}, i, j = 1, 2, \dots, n.$$

Note that when  $X_i = Y_j$ , we have  $\rho = 1$ ,  $\alpha_x = \alpha_y$  and  $\sigma_x = \sigma_y$ . Thus the

variance-covariance structure agrees with the variance-covariance structure in

univariate data analysis. Q.E.D.

## References

1. Blomberg SP, Garland T Jr., Ives AR (2003) Testing for phylogenetic signal in comparative data: behavioral traits are more labile. *Evolution* 57:717-745.
2. Jhwueng DC (2010) Problems in Phylogenetics Comparative Methods. Ph.D. Dissertation, Indiana University USA.
3. Øksendal B (2000) Stochastic differential equations: an introduction with applications. Springer-Verlag New York.
